# Supplementary material for: Vitamin D3 mediates miR-15a-5p inhibition of liver cancer cell proliferation via targeting E2F3
Source: PubMed Central journal article supplement — Oncol Lett. 2020 Apr 24;20(1):292–8. doi: 10.3892/ol.2020.11572 (PMC7285896; doi:10.3892/ol.2020.11572), 2020-04-24
Supplement: Supplementary_Data.pdf [file Supplementary_Data.pdf]

Figure S1. miR-15a-5p inhibitor partially reverses the effects of vitamin D3 on the proliferation of Hep3B and HepG2 cells. (A) MTT assay of Hep3B cells transfected with the miR-15a-5p inhibitor or inhibitor-ctrl after vitamin D3 treatment. (B) MTT assay of HepG2 cells transfected with the miR-15a-5p inhibitor or inhibitor-ctrl treated with vitamin D3. miR, microRNA; D3, vitamin D3; inhibitor-ctrl, inhibitor-control; OD, optical density. \*P<0.05 and \*\*P<0.01 vs. DMSO + inhibitor-ctrl.

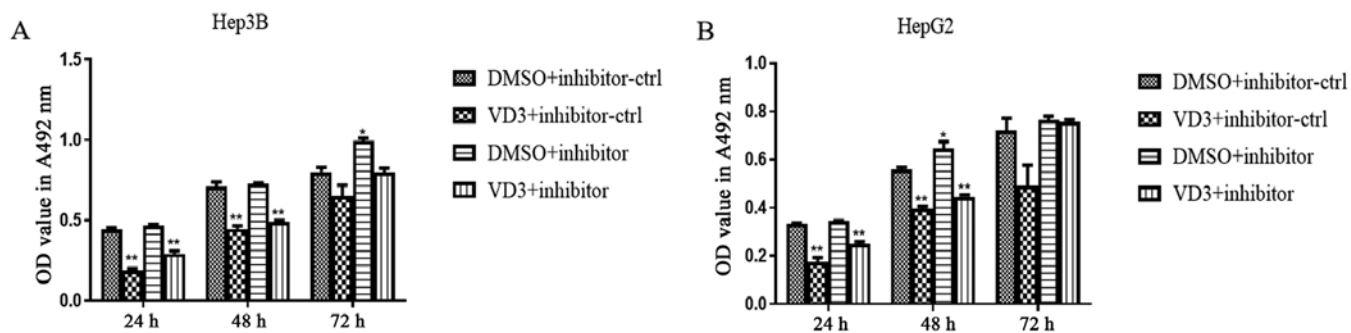

Table SI. Primers and oligonucleotides.

| Name                 | Sequence (5'-3')                                          |
|----------------------|-----------------------------------------------------------|
| U6-RT                | CGCTTCACGAATTTGCGTGTCAT                                   |
| U6-F                 | GCTTCGGCAGCACATATACTAAAAT                                 |
| U6-R                 | CGCTTCACGAATTTGCGTGTCAT                                   |
| miR-15a-5p-RT        | GTCGTATCCAGTGC GTGTTCGTGGAGTCGGCAATTGCACTGGATACGACCACAAAC |
| miR-15a-5p-F         | ATCCAGTGC GTGTTCGTG                                       |
| miR-15a-5p-R         | TGCTTAGCAGCACATAATG                                       |
| miR-214-3p-RT        | GTCGTATCCAGTGC GTGTTCGTGGAGTCGGCAATTGCACTGGATACGACACTGCCT |
| miR-214-3p-F         | ATCCAGTGC GTGTTCGTG                                       |
| miR-214-3p-R         | TGCTACAGCAGGCACAGAC                                       |
| miR-203a-3p-RT       | GTCGTATCCAGTGC GTGTTCGTGGAGTCGGCAATTGCACTGGATACGACCTAGTGG |
| miR-203a-3p-F        | ATCCAGTGC GTGTTCGTG                                       |
| miR-203a-3p-R        | TGCTGTGAAATGTTTAGGA                                       |
| miR-15a-5p mimics-S  | UAGCAGCACAUAAUGGUUUGUG                                    |
| miR-15a-5p mimics-A  | CAAACCAUUAUGUGCUGCUAUU                                    |
| mimics control-S     | UUCUCCGAACGUGUCACGUTT                                     |
| mimics control-A     | ACGUGACACGUUCGGAGAATT                                     |
| miR-15a-5p inhibitor | CACAAACCATTATGTGCTGCTA                                    |
| inhibitor-ctrl       | CAGTACTTTTGTGTAGTACAA                                     |
| siRNA-ctrl-S         | UUCUCCGAACGUGUCACGUTT                                     |
| siRNA-ctrl-A         | ACGUGACACGUUCGGAGAATT                                     |
| si-E2F3-S            | GACUUCAUGUGUAGUUGAUUU                                     |
| si-E2F3-A            | AUCAACUACACAUGAAGUCUU                                     |
